# Supplementary material
Source: publisher site journal article supplement (https://www.dovepress.com/get_supplementary_file.php?f=306846.docx)
Supplement: Supplementary file 1 [file get_supplementary_file.php]

**Supplementary materials**

Pag.

Figure S1-S6. 1D, 2D NMR and HR-ESI-MS spectra of euphorneroid E 2-5

Figure S7-S9. Three repeats of the original Western blot 6-8


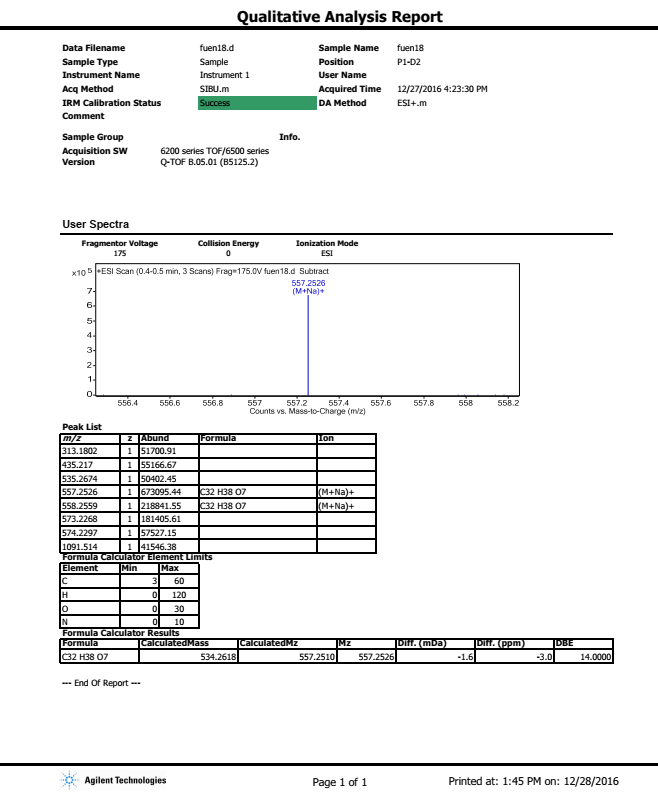


Figure S1. HR-ESI-MS spectrum of euphorneroid E

Figure S2. 1H-NMR spectrum (600 MHz, CDCl3) of euphorneroid E

Figure S3. 13C-NMR spectra (150 MHz, CDCl3) of euphorneroid E

Figure S4. HSQC spectrum of euphorneroid E

Figure S5. HMBC spectrum of euphorneroid E

Figure S6. ROESY spectrum of euphorneroid E


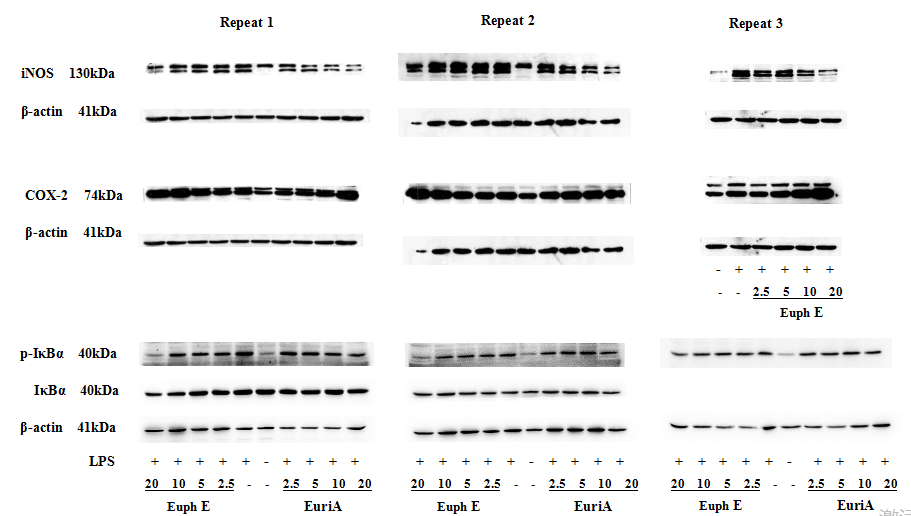


Figure S7. Three repeats of proteins iNOS,COX-2 and p-IκBα


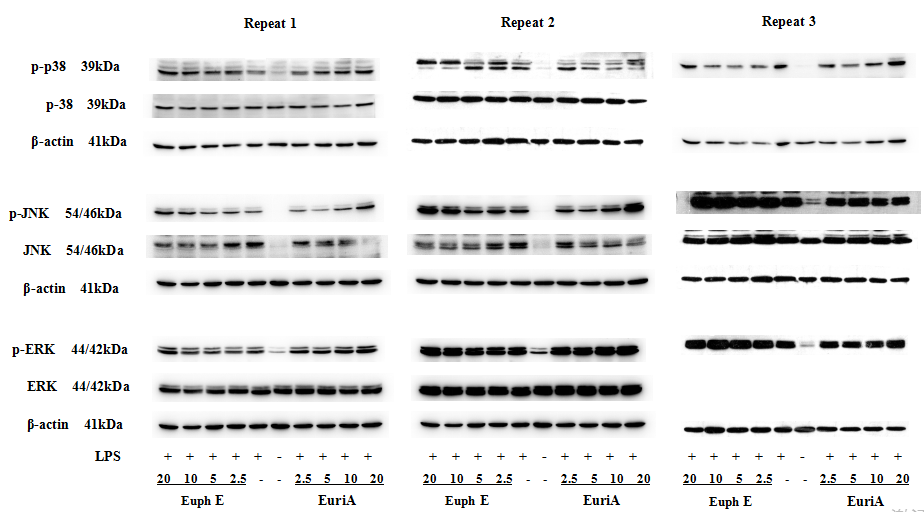
 Figure S8. Three repeats of proteins p-p38, p38, p-JNK, JNK, p-ERK and ERK


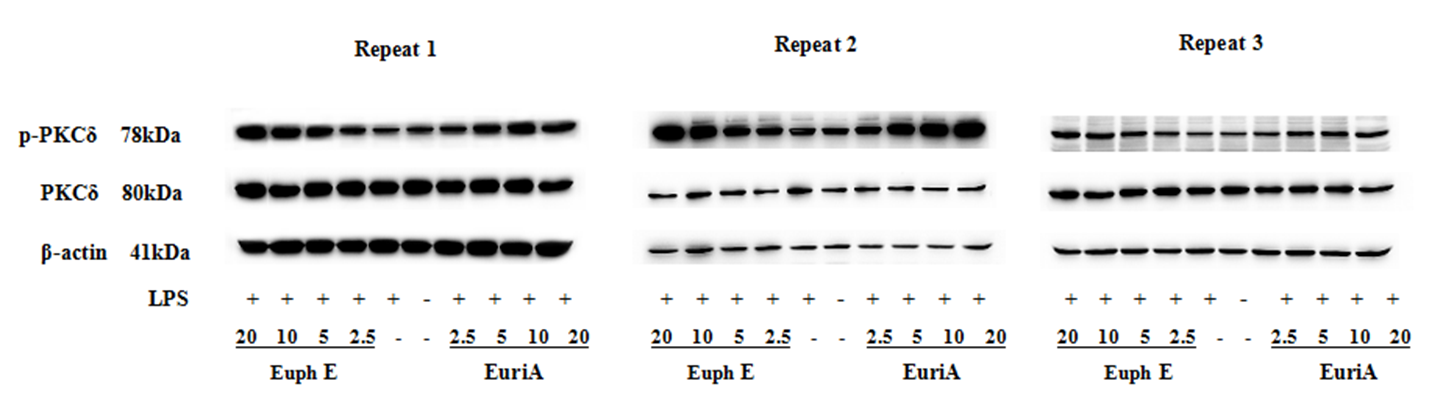


Figure S9. Three repeats of proteins p-PKCδ and PKCδ
